# Supplementary material for: High oxygen-vacancy diffusivity predicted for perovskite oxide Ca0.5Sr0.5Co0.8Fe0.2O2.5
Source: Royal Society of Chemistry journal article supplement (doi:10.1039/d2ta09897k), 2023-01-01
Supplement: d2ta09897k1.pdf [file d2ta09897k1.pdf]

## Supplementary information for: High oxygen-vacancy diffusivity predicted for perovskite oxide $\text{Ca}_{0.5}\text{Sr}_{0.5}\text{Co}_{0.8}\text{Fe}_{0.2}\text{O}_{2.5}$ <sup>†</sup>

Alexander Bonkowski,<sup>a</sup> Caitlin Perkampus,<sup>a</sup> and Roger A. De Souza<sup>\*a</sup>

The interactions in our molecular dynamics (MD) calculations are described with a short-range potential of the Buckingham form and a long-range coulombic term:

$$V_{ij}(r) = A_{ij} \exp\left(-\frac{r}{\rho_{ij}}\right) - \frac{C_{ij}}{r^6} + \frac{q_i q_j}{4\pi\epsilon_0 r}$$

The empirical parameters  $A_{ij}$  and  $\rho_{ij}$  represent Pauli repulsion;  $C_{ij}$  describes dispersion (van der Waals interactions);  $q_i$  and  $q_j$  are the formal ion charges, and  $\epsilon_0$  is the vacuum permittivity. We employ a set of parameters that has been used previously to examine BSCF materials.<sup>1,2</sup> We expand the model to include  $\text{Ca}^{2+}$  by using parameters derived for the same oxygen–oxygen potential. The potential parameters are given in Table S1. All MD calculations were carried out in the LAMMPS code<sup>3,4</sup>, with periodic boundary conditions, in an isothermal-isobaric ( $NpT$ ) ensemble ( $p_{\text{damp}} = 1$  ps,  $T_{\text{damp}} = 0.1$  ps) at  $p = 1013.25$  mbar, and a timestep of  $\delta t = 1$  fs. Metropolis Monte Carlo calculations<sup>5</sup> were carried out as implemented in the LAMMPS code.

**Table S1** Buckingham type potential parameters.

| Interaction                           | $A_{ij}$ / eV | $\rho_{ij}$ / Å | $C_{ij}$ / eVÅ <sup>-6</sup> | source |
|---------------------------------------|---------------|-----------------|------------------------------|--------|
| $\text{Ca}^{2+} - \text{O}^{2-}$ (I)  | 1340.18       | 0.3214          | 0.0                          | 6      |
| $\text{Ca}^{2+} - \text{O}^{2-}$ (II) | 1090.4        | 0.3437          | 0.0                          | 7      |
| $\text{Ba}^{2+} - \text{O}^{2-}$      | 1214.4        | 0.3522          | 0.0                          | 1,8    |
| $\text{Sr}^{2+} - \text{O}^{2-}$      | 774.2         | 0.3538          | 0.0                          | 9      |
| $\text{Co}^{3+} - \text{O}^{2-}$      | 1329.82       | 0.3087          | 0.0                          | 9,10   |
| $\text{Fe}^{3+} - \text{O}^{2-}$      | 1156.36       | 0.3299          | 0.0                          | 10     |
| $\text{O}^{2-} - \text{O}^{2-}$       | 22764.3       | 0.1490          | 43.0                         | 9,10   |

Simulations at 500 K show a cubic cell parameter of  $a(\text{BSCF}) = 3.799$  Å, exactly the same as Shiiba *et al.*<sup>2</sup>, and  $a(\text{CSCF}) = 3.744$  Å, slightly lower due to  $r_{\text{Ca}^{2+}} < r_{\text{Ba}^{2+}}$ .

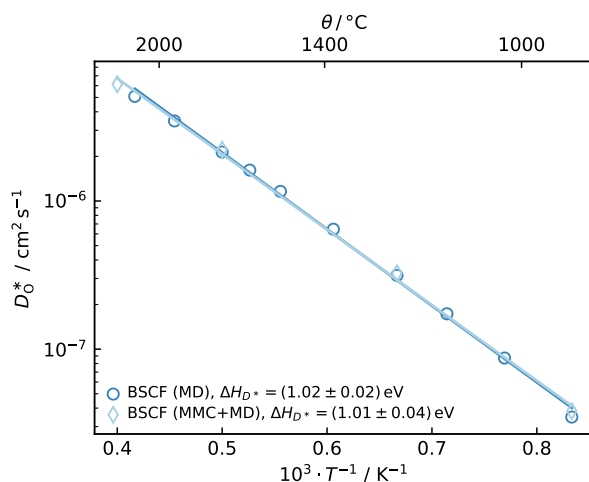

**Fig. S1** Oxygen tracer diffusion coefficients versus inverse temperature for cubic  $\text{Ba}_{0.5}\text{Sr}_{0.5}\text{Co}_{0.8}\text{Fe}_{0.2}\text{O}_{2.5}$ , obtained from MD simulations, with and without preceding MMC simulations.

<sup>a</sup> Institute for Physical Chemistry, RWTH Aachen University, 52074 Aachen, Germany. Fax: +49 241 80 92128; Tel: +49 241 80 94739; E-mail: desouza@pc.rwth-aachen.de

## Notes and references

- 1 C. Fisher, M. Yoshiya, Y. Iwamoto, J. Ishii, M. Asanuma and K. Yabuta, *Solid State Ionics*, 2007, **177**, 3425–3431.
- 2 H. Shiiba, C. L. Bishop, M. J. D. Rushton, M. Nakayama, M. Nogami, J. A. Kilner and R. W. Grimes, *J. Mater. Chem. A*, 2013, **1**, 10345.
- 3 S. Plimpton, *J. Comput. Phys.*, 1995, **117**, 1–19.
- 4 A. P. Thompson, H. M. Aktulga, R. Berger, D. S. Bolintineanu, W. M. Brown, P. S. Crozier, P. J. in 't Veld, A. Kohlmeyer, S. G. Moore, T. D. Nguyen, R. Shan, M. J. Stevens, J. Tranchida, C. Trott and S. J. Plimpton, *Comput. Phys. Commun.*, 2022, **271**, 108171.
- 5 N. Metropolis, A. W. Rosenbluth, M. N. Rosenbluth, A. H. Teller and E. Teller, *J. Chem. Phys.*, 1953, **21**, 1087–1092.
- 6 G. Mather, M. Islam and F. Figueiredo, *Adv. Funct. Mater.*, 2007, **17**, 905–912.
- 7 G. V. Lewis and C. Catlow, *J. Phys. C: Solid State Phys.*, 1985, **18**, 1149.
- 8 M. T. Buscaglia, V. Buscaglia, M. Viviani and P. Nanni, *J. Am. Ceram. Soc.*, 2004, **84**, 376–84.
- 9 M. Islam, M. Cherry and C. Catlow, *J. Solid State Chem.*, 1996, **124**, 230–237.
- 10 M. Cherry, M. Islam and C. Catlow, *J. Solid State Chem.*, 1995, **118**, 125–132.
